# Supplementary material for: Mapping strain modulated electronic structure perturbations in mixed phase bismuth ferrite thin films
Source: Royal Society of Chemistry journal article supplement (doi:10.1039/c4tc02064b), 2014-12-22
Supplement: c4tc02064b1.pdf [file c4tc02064b1.pdf]

## Mapping strain modulated electronic structure perturbations in mixed phase bismuth ferrite thin films

P.S.S.R. Krishnan<sup>a</sup>, J.A. Aguiar<sup>b,c</sup>, Q.M. Ramasse<sup>d</sup>, D.M. Kepaptsoglou<sup>d</sup>, W.-I. Liang<sup>e</sup>, Y.-H. Chu<sup>e</sup>, N. D. Browning<sup>f</sup>, P. Munroe<sup>a</sup> and V. Nagarajan<sup>a</sup>

<sup>a</sup> School of Materials Science and Engineering, University of New South Wales, Sydney NSW 2052, Australia

<sup>b</sup> Material Science and Technology Division, Los Alamos National Laboratory, Los Alamos, NM 87545, USA

<sup>c</sup> Materials and Characterization, National Renewable Energy Laboratory, Golden, CO 080401, USA

<sup>d</sup> SuperSTEM Laboratory, STFC Daresbury Campus, Keckwick Lane, Daresbury, WA4 4AD, United Kingdom

<sup>e</sup> Department of Materials Science and Engineering, National Chiao Tung University, Hsinchu 30010, Taiwan

<sup>f</sup> Fundamental and Computational Sciences Directorate, Pacific Northwest National Laboratory, 902 Battelle Boulevard, Richland, WA 99352, USA

### Supplementary 1

Peak Fitting of the Experimental Near Edge Oxygen K Spectral Character

In acquiring the O K edge near fine structure across the MPB we analyzed the structure using multiple linear least squares peak fitting (MLLS). Figure S1(a) plots the change in relative peak shift for each of the six peaks (from 0 to 5) as a function of distance whilst S1(b) plots the normalized peak area for each peak as a function of distance along the profile line.

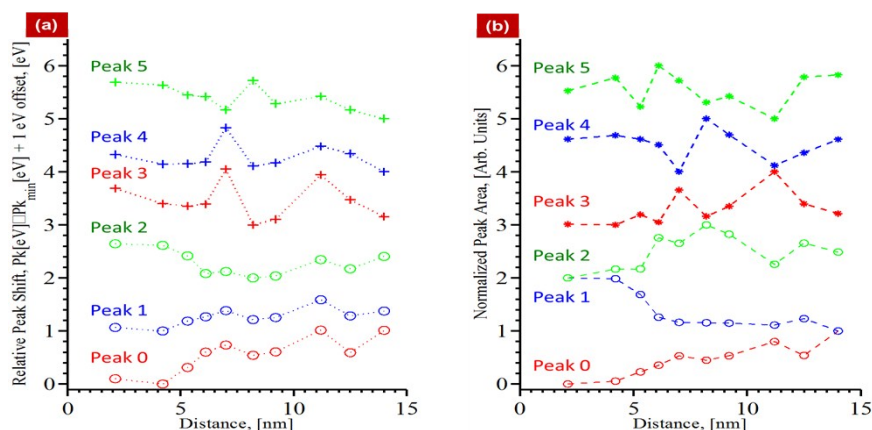

Fig. S1 Multiple least linear square fitting for O-k spectra across R-T phase (a) peak shift and (b) peak area.

## Supplementary 2

The effect of shear on T-phase BFO was calculated for two different shear angles 2 and 5 degrees. The spectrum was calculated for symmetry with 3 and 4 nearest atoms and the average spectrum is reported. From the figure it can be observed that the peak 0 appears predominantly at 5 degree shear, while all the other peaks show no variation.

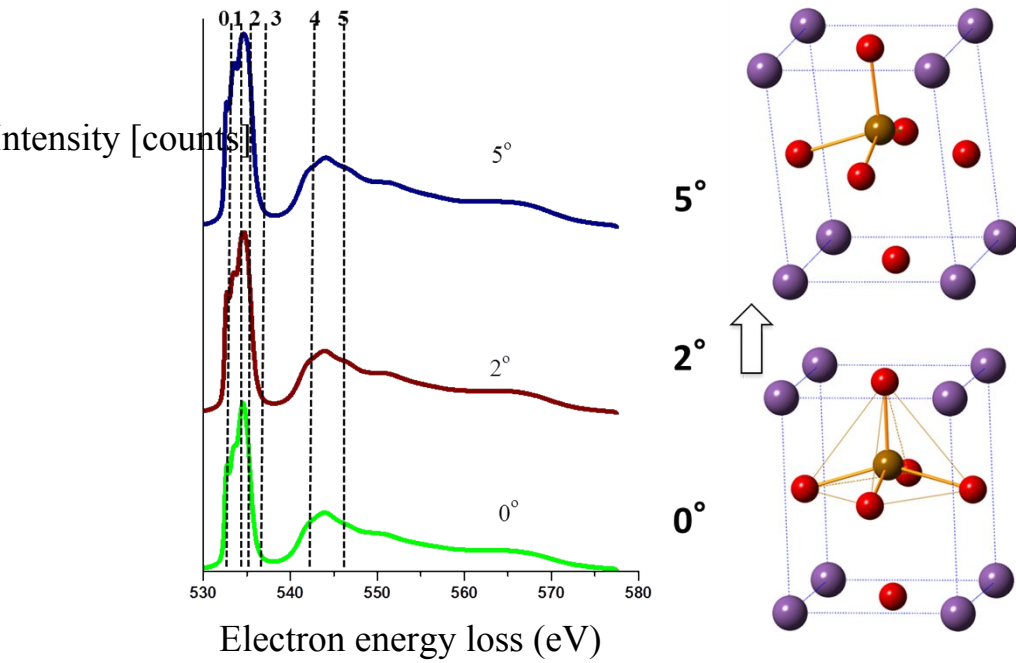

Fig.S2 Simulated O-k EEL spectra for T-phase BFO with varied shear angles.

### S3. Fitting Theoretical and Experimental Spectra

For each spectrum, following peak normalization where the maximum intensity was set to one, the same initial six peaks were input into a multiple linear least squares peak fitting algorithm and used to fit all spectra. The peaks were fit within a 19.5 eV window beyond the edge onset.

The following initial peak parameters were applied:

| Intensity (Counts) | Relative Energy Position Beyond the Edge Onset | Peak Width (eV) |
|--------------------|------------------------------------------------|-----------------|
| 0.3                | 2.75                                           | 2               |
| 0.8                | 4.5                                            | 2               |
| 0.8                | 6.75                                           | 3.5             |
| 0.2                | 11.5                                           | 1.5             |
| 0.65               | 13                                             | 2.5             |
| 0.40               | 16                                             | 4.5             |

Following these initial parameters, a table of fits was established for each calculated and experimental spectra ensuring a better than 80% confidence based on deviation of the peak positions based on the following equation

Peak Position (eV) Deviation :

$$P_{rms} = \sqrt{\frac{(P_1^1 - P_1^2)^2 + (P_2^1 - P_2^2)^2 + \dots + (P_n^1 - P_n^2)^2}{n}}$$

where  $P_1^1$  and  $P_1^2$  are the energy positions for the same peak for two separate spectra and  $n$  is the number of peaks used to fit the spectra. Based on this metric, the results were tabulated and compared using a genetic search algorithm. Based on the outcome of the genetic search algorithm, illustrated below, we compared and ranked the calculated spectra against experimental spectra.

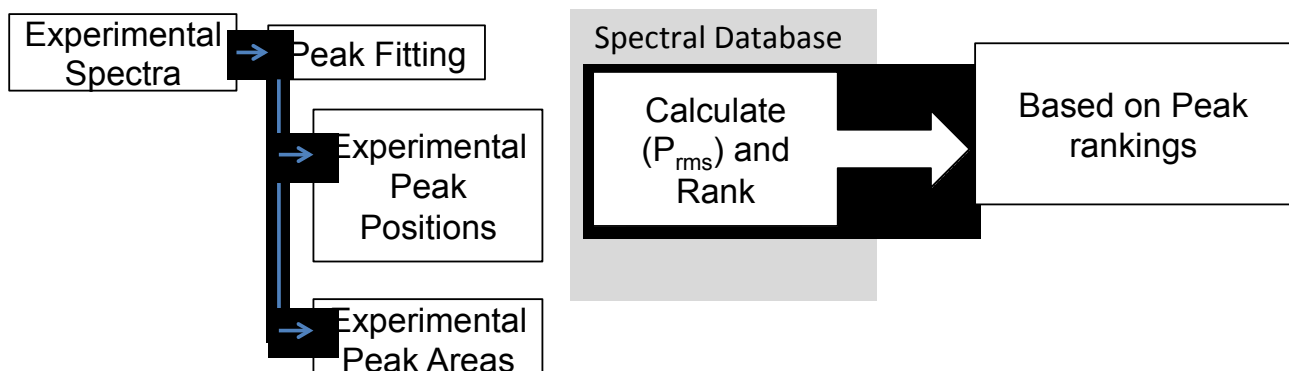

As an example we show below partial data, which shows the various fitting results as a function of c/a on the peak positions only. For simplicity only  $P_{rms}$  is primarily considered. However, when two candidate fits exhibited close  $P_{rms}$  values, the spectra that matched intensities as well as positions was manually chosen. We find for example, based on  $P_{rms}$  alone the T phase shows a lower deviation compared to the T' phase at position 6, that is the interface. (8. 2nm). However when taking the over all shape the T' produced a much better confidence of fit.

| Probe                                     | Distance (nm) | Peak Position 1 | Peak Position 2 | Peak Position 3 | Peak Position 4 | Peak Position 5 | Peak Position 6 | Deviation, ( $P_{rms}$ ) |
|-------------------------------------------|---------------|-----------------|-----------------|-----------------|-----------------|-----------------|-----------------|--------------------------|
| <b>Position 1</b>                         | <b>2.10</b>   | <b>2.54</b>     | <b>4.09</b>     | <b>6.60</b>     | <b>11.58</b>    | <b>12.96</b>    | <b>15.95</b>    |                          |
| <i>Fitted R: c/a 0.98</i>                 |               |                 | 3.68            | 6.43            | 11.72           |                 | 15.94           | <b>0.23</b>              |
| <i>Bulk R Phase Displacement</i>          |               |                 | 4.19            | 6.92            |                 |                 | 15.06           | <b>0.55</b>              |
| <i>Bulk R Phase</i>                       |               | 2.28            | 4.75            | 5.89            |                 | 13.55           |                 | <b>1.04</b>              |
| <b>Position 2</b>                         | <b>4.20</b>   | <b>2.29</b>     | <b>3.94</b>     | <b>6.71</b>     | <b>11.77</b>    | <b>13.38</b>    | <b>16.85</b>    |                          |
| <i>Fitted R: c/a 0.98</i>                 |               |                 | 3.68            | 6.43            | 11.72           |                 | 15.94           | <b>0.50</b>              |
| <i>Bulk R Phase Displacement</i>          |               |                 | 4.19            | 6.92            |                 |                 | 15.06           | <b>1.05</b>              |
| <i>Bulk R Phase</i>                       |               | 2.28            | 4.75            | 5.89            |                 | 13.55           |                 | <b>1.15</b>              |
| <b>Position 3</b>                         | <b>5.30</b>   | <b>2.36</b>     | <b>4.06</b>     | <b>6.74</b>     | <b>11.42</b>    | <b>12.82</b>    | <b>15.45</b>    |                          |
| <i>Fitted R: c/a 0.98</i>                 |               |                 | 3.68            | 6.43            | 11.72           |                 | 15.94           | <b>0.38</b>              |
| <i>Bulk R Phase Displacement</i>          |               |                 | 4.19            | 6.92            |                 |                 | 15.06           | <b>0.26</b>              |
| <i>Bulk R Phase</i>                       |               | 2.28            | 4.75            | 5.89            |                 | 13.55           |                 | <b>1.15</b>              |
| <b>Position 4</b>                         | <b>6.10</b>   | <b>2.35</b>     | <b>3.84</b>     | <b>6.45</b>     | <b>11.62</b>    | <b>13.15</b>    | <b>15.81</b>    |                          |
| <i>Fitted R: c/a 0.98</i>                 |               |                 | 3.68            | 6.43            | 11.72           |                 | 15.94           | <b>0.11</b>              |
| <i>Bulk R Phase Displacement</i>          |               |                 | 4.19            | 6.92            |                 |                 | 15.06           | <b>0.55</b>              |
| <i>Bulk R Phase</i>                       |               | 2.28            | 4.75            | 5.89            |                 | 13.55           |                 | <b>0.57</b>              |
| <b>Position 5</b>                         | <b>7.00</b>   | <b>2.41</b>     | <b>4.01</b>     | <b>6.54</b>     | <b>11.41</b>    | <b>12.63</b>    | <b>15.26</b>    |                          |
| <i>Fitted R: c/a 0.98</i>                 |               |                 | 3.68            | 6.43            | 11.72           |                 | 15.94           | <b>0.41</b>              |
| <i>Bulk T Phase c/a 1.23 Displacement</i> |               | 3.25            | 4.85            | 5.30            |                 |                 | 14.28           | <b>0.99</b>              |
| <i>Bulk T Phase c/a 1.28 Displacement</i> |               |                 | 3.21            | 6.45            |                 |                 | 14.71           | <b>0.56</b>              |
| <i>Bulk T Phase</i>                       |               |                 | 3.55            | 5.38            |                 | 13.91           | 13.91           | <b>1.12</b>              |
| <b>Position 6</b>                         | <b>8.20</b>   | <b>1.44</b>     | <b>3.57</b>     | <b>6.59</b>     | <b>10.95</b>    | <b>12.80</b>    | <b>16.34</b>    |                          |
| <i>Fitted T'</i>                          |               |                 | 3.97            | 6.19            | 11.11           |                 | 15.30           | <b>0.60</b>              |
| <i>Fitted T: c/a 1.18</i>                 |               |                 | 3.46            | 6.10            |                 | 12.10           | 16.24           | <b>0.43</b>              |
| <i>Bulk T Phase c/a 1.23 Displacement</i> |               | 3.25            | 4.85            | 5.30            |                 |                 | 14.28           | <b>1.65</b>              |
| <i>Bulk T Phase c/a 1.28 Displacement</i> |               |                 | 3.21            | 6.45            |                 |                 | 14.71           | <b>0.96</b>              |
| <i>Bulk T Phase</i>                       |               |                 | 3.55            | 5.38            |                 | 13.91           | 13.91           | <b>1.47</b>              |
| <b>Position 7</b>                         | <b>9.20</b>   | <b>2.09</b>     | <b>3.66</b>     | <b>6.71</b>     | <b>10.89</b>    | <b>12.75</b>    | <b>16.35</b>    |                          |
| <i>Fitted T: c/a 1.18</i>                 |               |                 | 3.46            | 6.10            |                 | 12.10           | 16.24           | <b>0.46</b>              |
| <i>Bulk T Phase c/a 1.23 Displacement</i> |               | 3.25            | 4.85            | 5.30            |                 |                 | 14.28           | <b>1.51</b>              |
| <i>Bulk T Phase c/a 1.28 Displacement</i> |               |                 | 3.21            | 6.45            |                 |                 | 14.71           | <b>0.99</b>              |
| <i>Bulk T Phase</i>                       |               |                 | 3.55            | 5.38            |                 | 13.91           | 13.91           | <b>1.51</b>              |
| <b>Position 8</b>                         | <b>11.20</b>  | <b>2.45</b>     | <b>4.23</b>     | <b>6.91</b>     | <b>11.39</b>    | <b>12.46</b>    | <b>14.91</b>    |                          |
| <i>Fitted T: c/a 1.18</i>                 |               |                 | 3.46            | 6.10            |                 | 12.10           | 16.24           | <b>0.89</b>              |
| <i>Bulk T Phase c/a 1.23 Displacement</i> |               | 3.25            | 4.85            | 5.30            |                 |                 | 14.28           | <b>1.00</b>              |
| <i>Bulk T Phase c/a 1.28 Displacement</i> |               |                 | 3.21            | 6.45            |                 |                 | 14.71           | <b>0.65</b>              |
| <i>Bulk T Phase</i>                       |               |                 | 3.55            | 5.38            |                 | 13.91           | 13.91           | <b>1.21</b>              |
| <b>Position 9</b>                         | <b>12.50</b>  | <b>2.13</b>     | <b>3.87</b>     | <b>6.75</b>     | <b>11.23</b>    | <b>12.72</b>    | <b>15.30</b>    |                          |
| <i>Fitted T: c/a 1.18</i>                 |               |                 | 3.46            | 6.10            |                 | 12.10           | 16.24           | <b>0.68</b>              |
| <i>Bulk T Phase c/a 1.23 Displacement</i> |               | 3.25            | 4.85            | 5.30            |                 |                 | 14.28           | <b>1.16</b>              |
| <i>Bulk T Phase c/a 1.28 Displacement</i> |               |                 | 3.21            | 6.45            |                 |                 | 14.71           | <b>0.54</b>              |
| <i>Bulk T Phase</i>                       |               |                 | 3.55            | 5.38            |                 | 13.91           | 13.91           | <b>1.15</b>              |
| <b>Position 10</b>                        | <b>14.00</b>  | <b>1.87</b>     | <b>3.85</b>     | <b>7.11</b>     | <b>11.40</b>    | <b>12.72</b>    | <b>15.77</b>    |                          |
| <i>Fitted T: c/a 1.18</i>                 |               |                 | 3.46            | 6.10            |                 | 12.10           | 16.24           | <b>0.66</b>              |
| <i>Bulk T Phase c/a 1.23 Displacement</i> |               | 3.25            | 4.85            | 5.30            |                 |                 | 14.28           | <b>1.45</b>              |
| <i>Bulk T Phase c/a 1.28 Displacement</i> |               |                 | 3.21            | 6.45            |                 |                 | 14.71           | <b>0.81</b>              |
| <i>Bulk T Phase</i>                       |               |                 | 3.82            | 5.26            |                 | 14.49           | 19.34           | <b>2.20</b>              |

Note : Peak energy values are defined beyond the edge onset

#### S4. Quantifying the Valence State of Iron

To quantify the valence state of iron in bismuth ferrite we performed multiple linear least squares fitting. Utilizing the reference spectra and protocols given in van Aken et al. [Physics and Chemistry of Minerals, **29**, 188-200 (2002)] Fits were made for various iron valence states ranging from  $\text{Fe}^{3+}$  to  $\text{Fe}^{2+}$ . After processing the experimental spectra, in Figure S4(a) we report the normalized weights for each of the major spectral components utilized to fit the experimental  $\text{Fe L}_3$  peak in Figure S4(b).

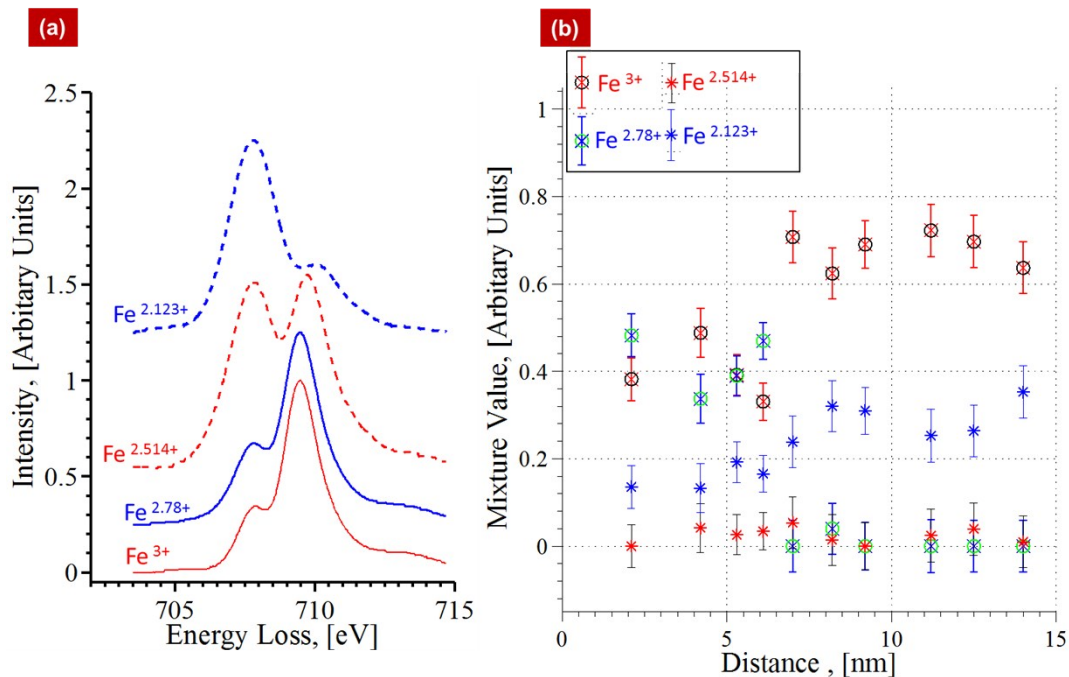

Fig.S4 The simulated Fe-L2,3 EEL spectra with their respective valence state and (b) the change in Fe valence state across T-R phase BFO.
